# Supplementary material for: High-Throughput CRISPR Screening Identifies Genes Involved in Macrophage Viability and Inflammatory Pathways
Source: PubMed Central journal article supplement — Cell Rep. Author manuscript; Available in PMC 2021 Feb 23. (PMC7901356; doi:10.1016/j.celrep.2020.108541), 2020-12-29
Supplement: NIHMS1658621-supplement-1.pdf [file NIHMS1658621-supplement-1.pdf]

**Cell Reports, Volume 33**

## **Supplemental Information**

### **High-Throughput CRISPR Screening Identifies**

### **Genes Involved in Macrophage Viability**

### **and Inflammatory Pathways**

**Sergio Covarrubias, Apple Cortez Vollmers, Allyson Capili, Michael Boettcher, Aaron Shulkin, Michele Ramos Correa, Haley Halasz, Elektra K. Robinson, Laura O'Briain, Christopher Vollmers, James Blau, Sol Katzman, Michael T. McManus, and Susan Carpenter**

Figure S1.

A.

### mouse sgRNA library composition

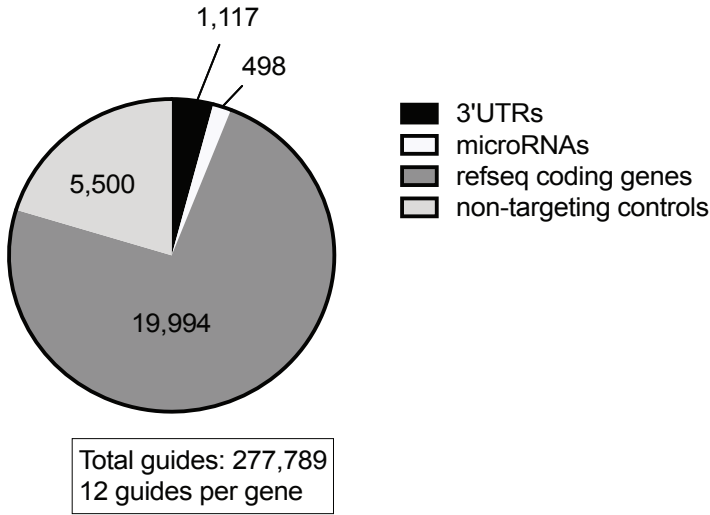

B.

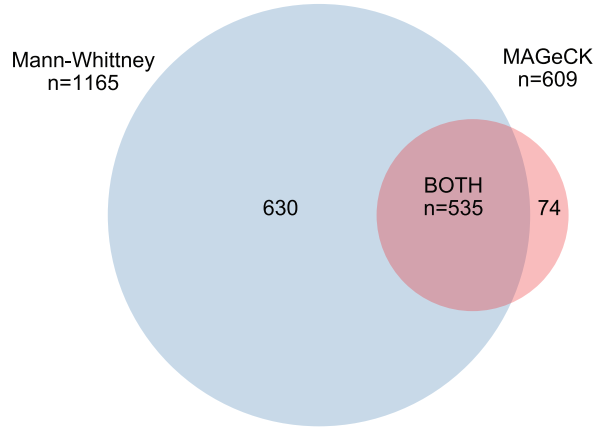

C.

### Genes with FDR<0.05 (MAGeCK Analysis)

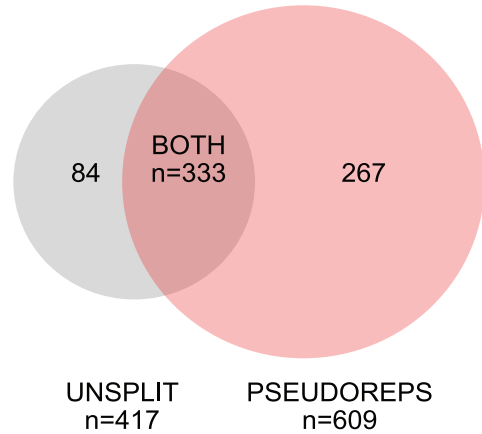

**Figure S1: Comparing analysis screening tools**, related to Figure 1. A. Breakdown of all genes targeted by our custom mouse sgRNA library is displayed. B. Venn diagram. Significant genes were determined by Mann-Whittney U-test and MAGeCK analysis (FDR<0.05). 88% of significant genes identified in the MAGeCK analysis were also identified in the Mann-Whittney U-Test. C. Venn diagram. Significant genes were determined on unsplit and insamples replicates by MAGeCK analysis. 80% of the significant genes in the unsplit samples were also identified in the replicate samples.

Figure S2

**Genes with opposite phenotype  
iBMDM vs GenomeCRISPR (500 screens)**

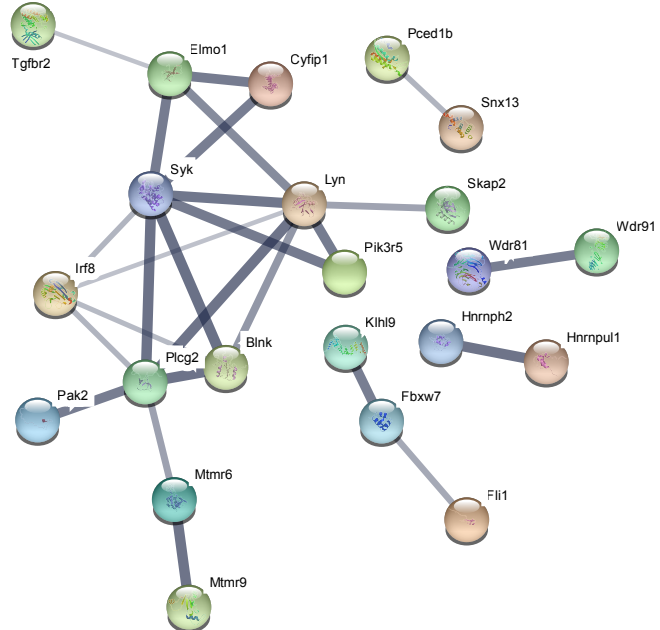

| pathway  | description                       |         |
|----------|-----------------------------------|---------|
| mmu04662 | B-cell receptor signaling pathway | 0.00023 |
| mmu04664 | Fc epsilon RI signaling pathway   | 0.0025  |
| mmu04064 | NF-kappa B signaling pathway      | 0.006   |
| mmu04066 | HIF-1 signaling pathway           | 0.0064  |

**Figure S2: Comparison of current screen to CRISPR screen database**, related to Figure 1. Genes with opposite phenotypes in our screen compared to the GenomeCRISPR database are displayed visually using String-DB. KEGG pathway Go-term enrichment is also shown.

Figure S3

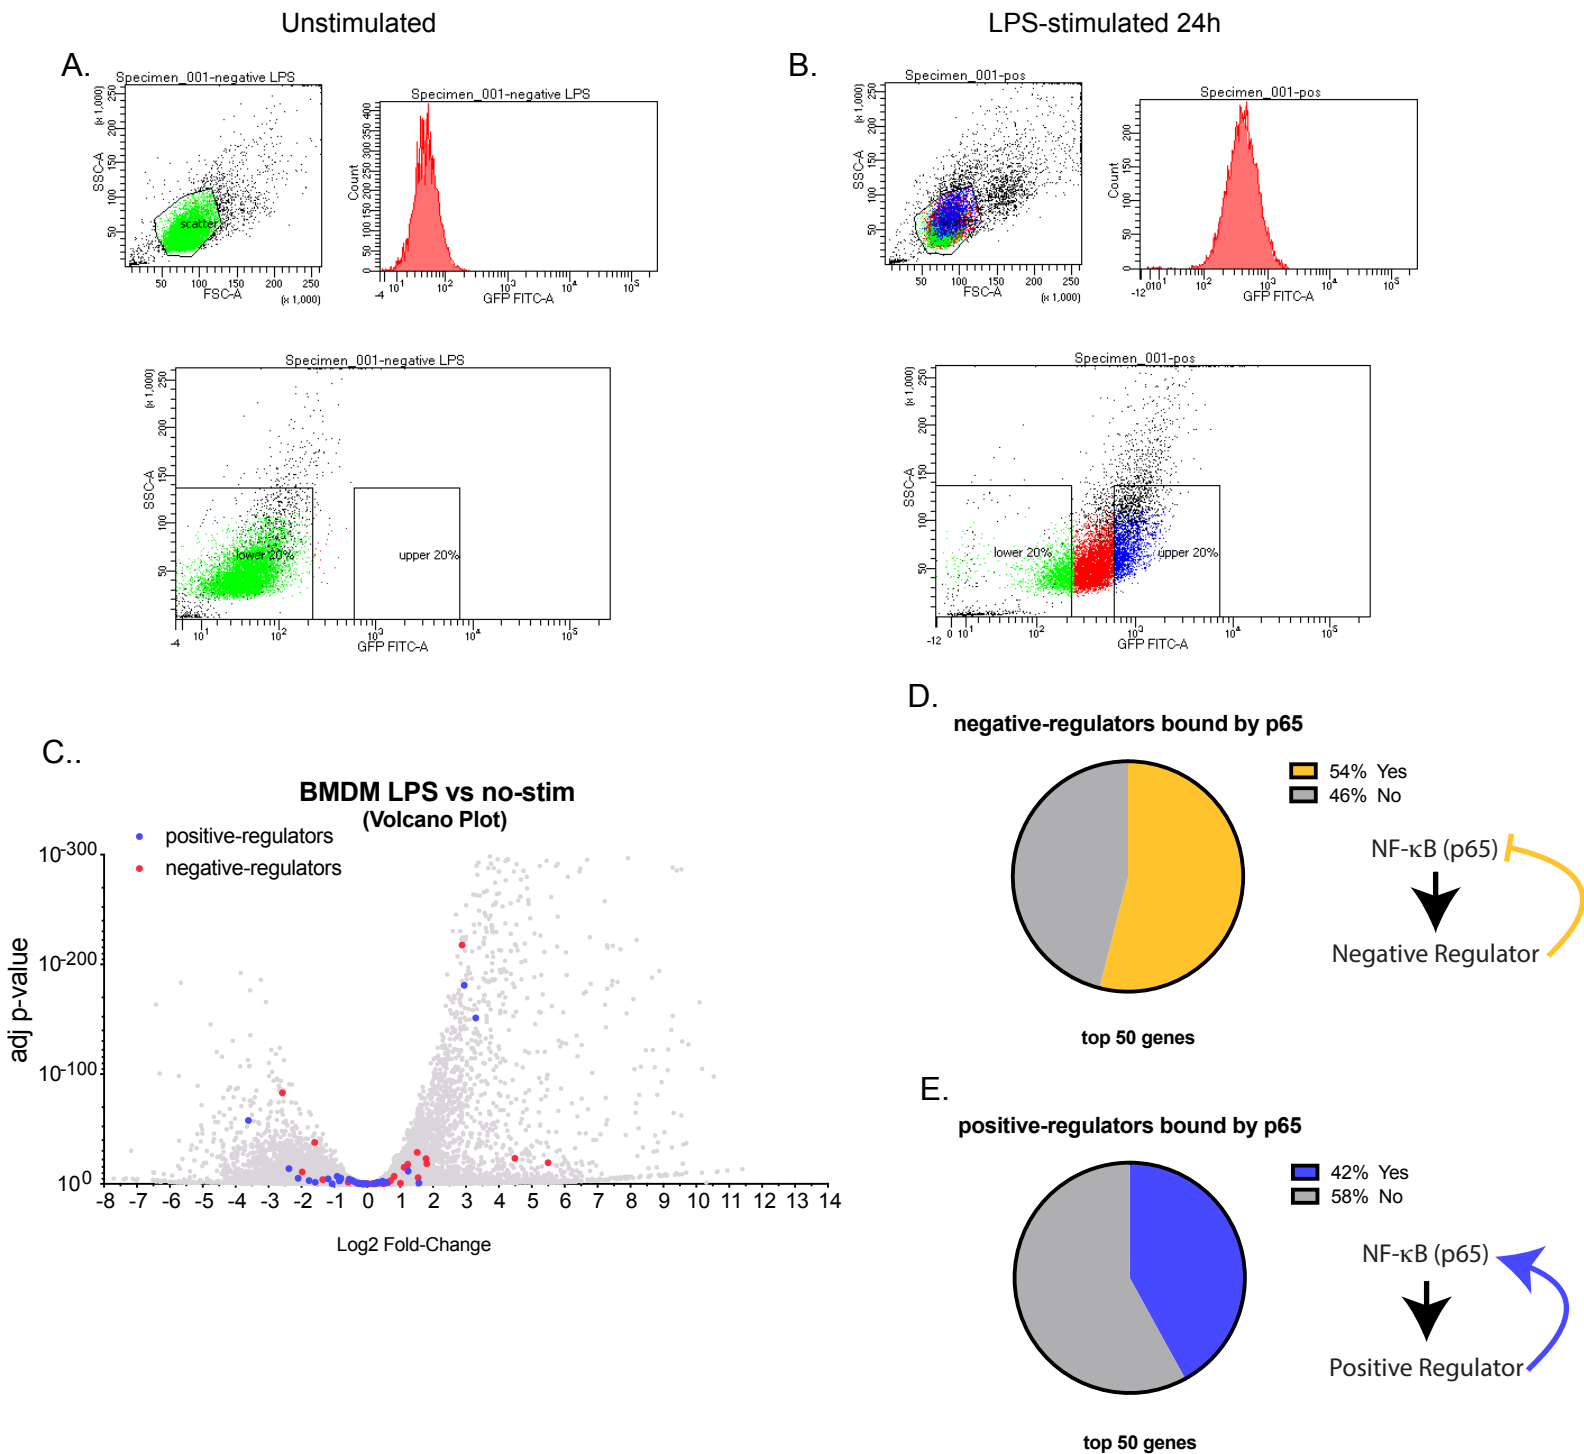

**Figure S3: Expression and p65-binding of NF- $\kappa$ B screen hits**, related to Figure 3. A-B. NF- $\kappa$ B FACS screen gating strategy for unstimulated cells (A) or 24 h LPS stimulated cells (B). C. Differentially expressed genes in 6 h LPS vs unstimulated BMDMs are displayed as log<sub>2</sub> fold-change vs. adjusted p-value volcano plot from previously published data (Zhang et al., 2017). Expression of top 50 positive regulators (blue) and top 50 negative regulators (yellow) is shown. D-E. All p65 targets were determined using the ChIP-seq data from (Lam et al., 2013). Positive p65 binding was called if a p65 peak was greater than 10 and was within 1kb of the annotated transcription start site (TSS). P65 promoter binding was then assessed for the top negative (D) and positive (E) regulators.

Figure S4

A.

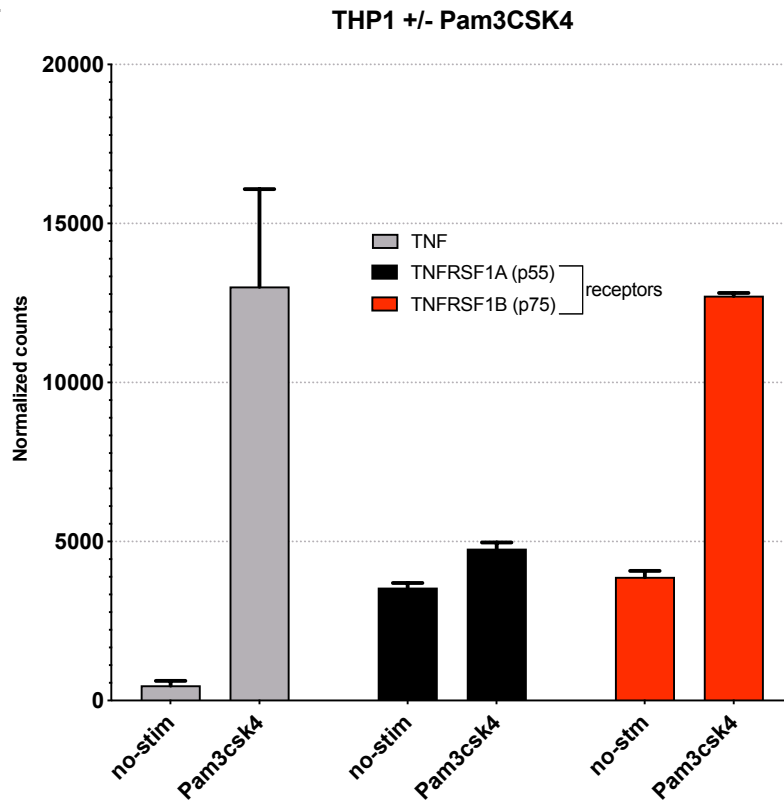

**Figure S4: Expression of TNF and TNF receptors in human cells**, related to Figure 4. A. Differentially expressed genes were determined for 6h Pam3CSK4-stimulated or unstimulated THP1 (ATCC). Normalized counts +/- SD are displayed for TNF, TNFRSF1A and TNFRSF1B.
